# Supplementary material for: Genome-independent hypoxic repression of estrogen receptor alpha in breast cancer cells
Source: PubMed Central journal article supplement (PMC5358051; doi:10.1186/s12885-017-3140-9), 2017-03-20
Supplement: 12885_2017_3140_MOESM3_ESM.pdf [file 12885_2017_3140_MOESM3_ESM.pdf]

**A***ESR1*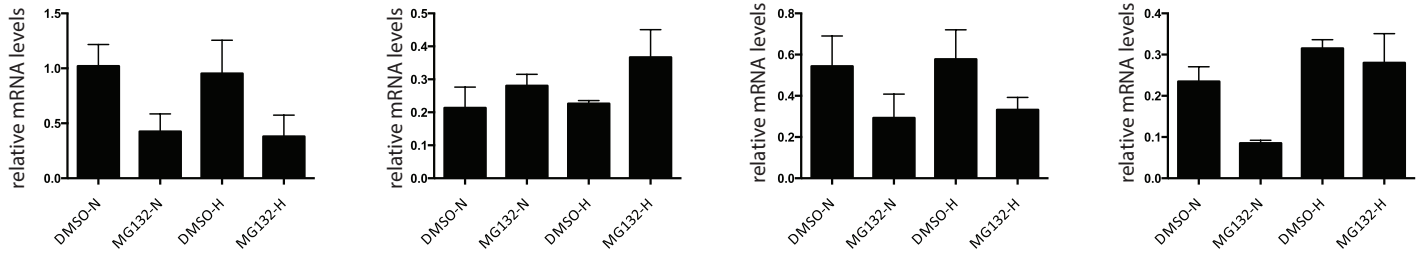**MCF7****BT474****T47D****ZR75B***HIF1A*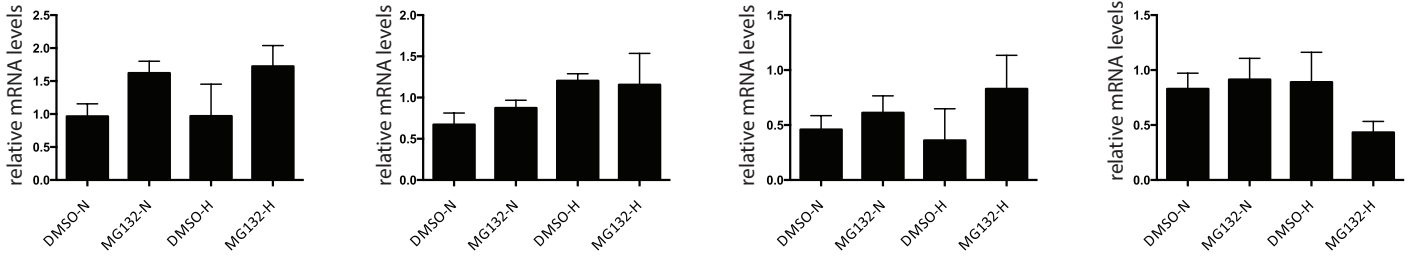**MCF7****BT474****T47D****ZR75B****B****HIF-1 $\alpha$** **ER $\alpha$** 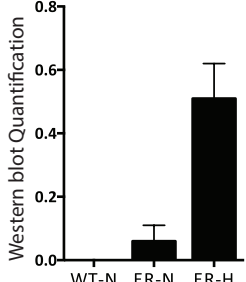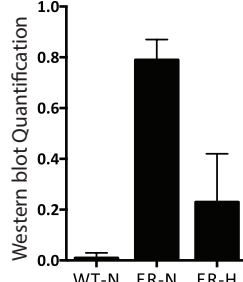**M231****M231****C****p-p70-S6K****p-4E-BP-1**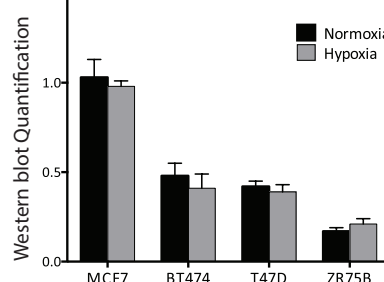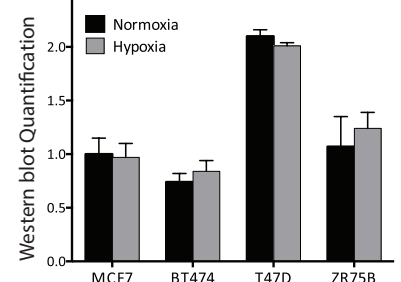**MCF7****BT474****T47D****ZR75B****D***HIF1- $\alpha$* 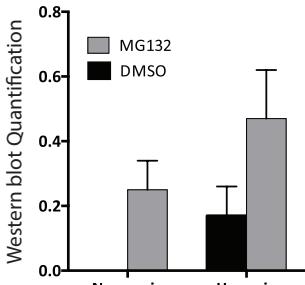**MCF7**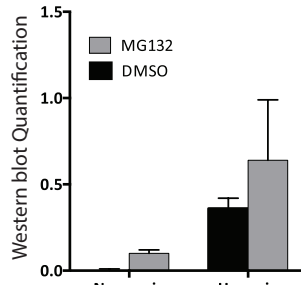**BT474**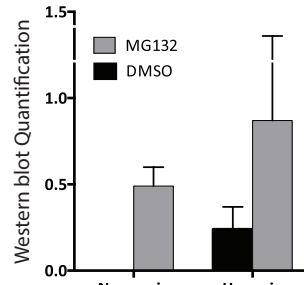**T47D**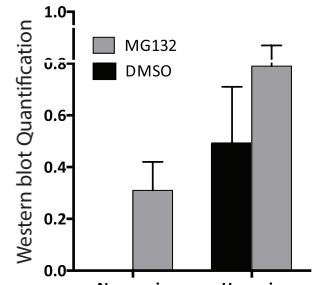**ZR75B***ER- $\alpha$* 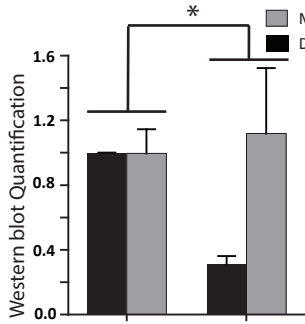**MCF7**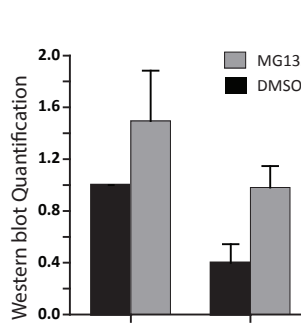**BT474**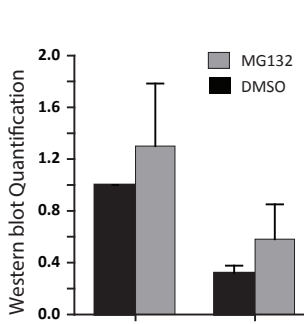**T47D**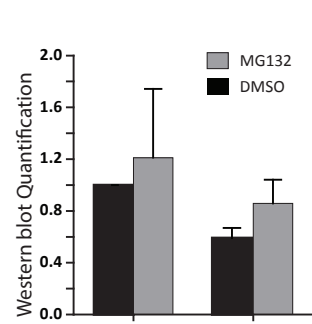**ZR75B**
