# Supplementary material for: Genome-independent hypoxic repression of estrogen receptor alpha in breast cancer cells
Source: PubMed Central journal article supplement (PMC5358051; doi:10.1186/s12885-017-3140-9), 2017-03-20

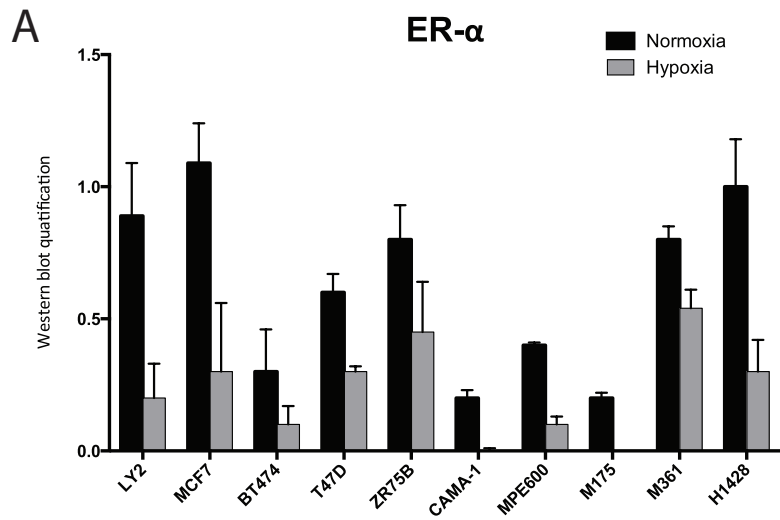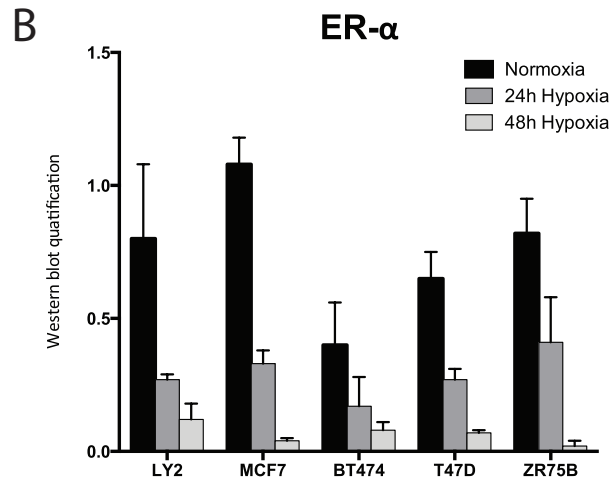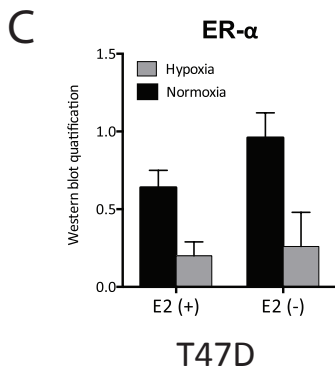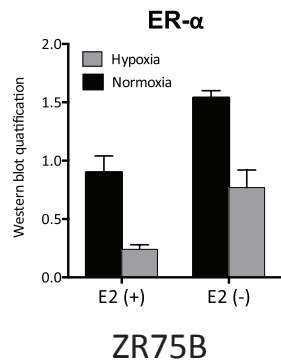

Supplement: 12885_2017_3140_MOESM4_ESM.pdf [file 12885_2017_3140_MOESM4_ESM.pdf]
