# Supplementary material for: Genome-independent hypoxic repression of estrogen receptor alpha in breast cancer cells
Source: Springer Nature journal article supplement (doi:10.1186/s12885-017-3140-9), 2017-03-20

A

MCF7

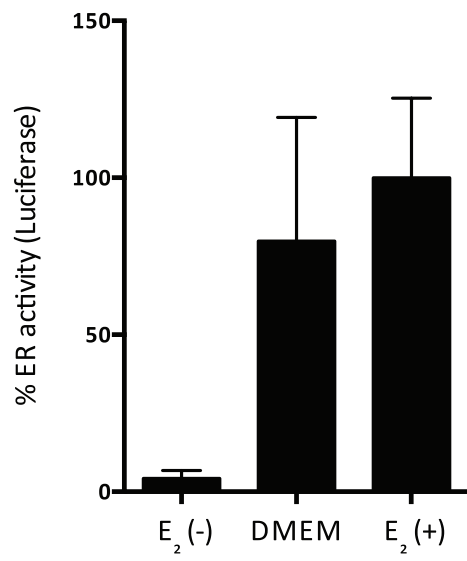

B

T47D

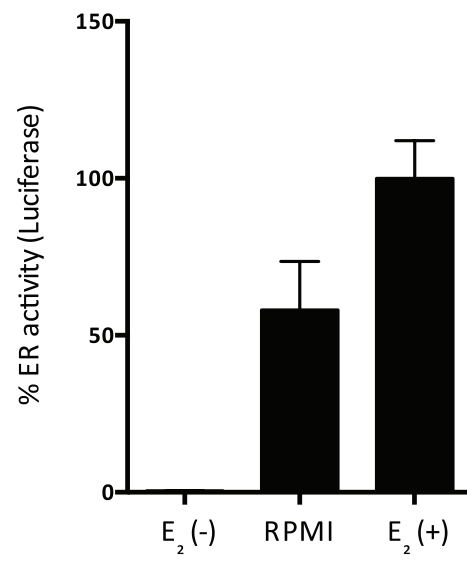

Supplement: MOESM2 [file 12157640]
